# Supplementary material
Source: PubMed Central journal article supplement (PMC2678648)
Supplement: 0806742106_0806742106SI.pdf [file 0806742106_0806742106SI.pdf]

# Supporting Information

Bougarne et al. 10.1073/pnas.0806742106

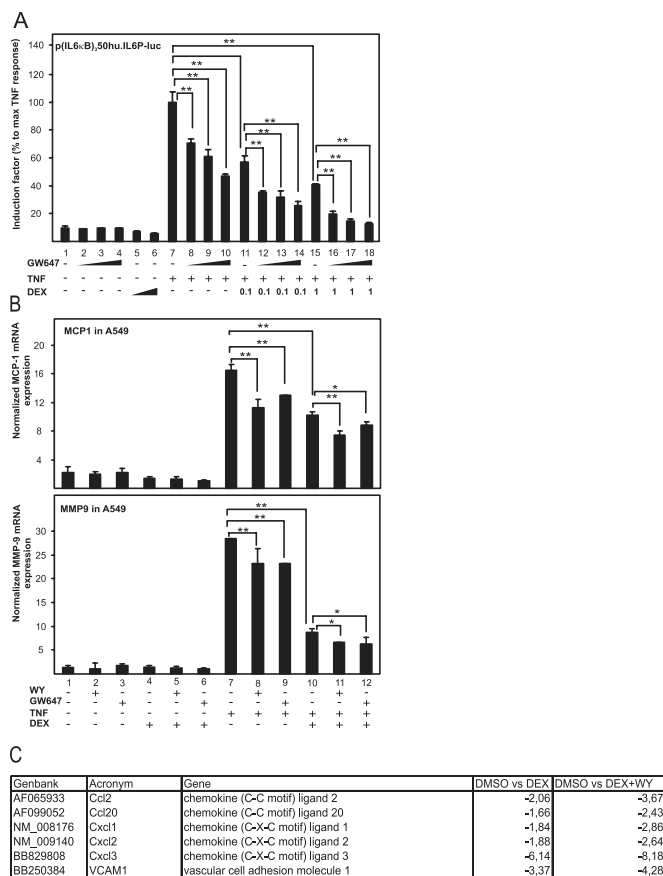

**Fig. S1.** PPAR $\alpha$  and GR $\alpha$  cooperate to inhibit NF- $\kappa$ B-driven gene expression. (A) The additive antiinflammatory effect of dexamethasone (DEX) and peroxisome proliferator-activated receptor (PPAR) agonists converges on NF- $\kappa$ B. The figure shows that GW647 and DEX can separately mediate the inhibition of TNF-induced gene expression in a dose-responsive manner (lanes 8–10 and lanes 11 and 15 compared with lane 7) in L929sA cells, stably transfected with p(IL6 $\kappa$ B)<sub>3</sub>50hu.IL6P-luc<sup>+</sup>, an NF- $\kappa$ B-dependent recombinant promoter construct. The simultaneous activation of PPAR $\alpha$  and glucocorticoid receptor  $\alpha$  (GR $\alpha$ ) (lanes 12–14 compared with lane 11 and lanes 16–18, compared with lane 15) results in a clear additive repression of TNF-induced NF- $\kappa$ B-driven promoter activity. L929sA cells with stably integrated p(IL6 $\kappa$ B)<sub>3</sub>50hu.IL6P-luc<sup>+</sup> were preincubated with solvent, DEX (1 or 0.1  $\mu$ M), GW647 (1, 0.5, or 0.25  $\mu$ M) or various combinations thereof, for 1 h, before TNF (2,000 units/mL) was added, where indicated, for 6 h. Cell lysates were assayed for luc activities and normalized with  $\beta$ -gal activities. Promoter activities are expressed as relative induction factor calculated as percentage of maximal TNF response. Results are shown  $\pm$  SD. \*\*,  $P < 0.01$ . (B) PPAR $\alpha$  agonists inhibit mRNA expression of inflammatory markers in A549 cells. The results obtained for IL-6 in L929sA were confirmed in A549 cells at the mRNA level, via QPCR analysis, for other inflammatory markers, namely monocyte chemoattractant protein (MCP)-1 and matrix metalloproteinase (MMP)-9. PPAR $\alpha$  agonists are able to enhance the glucocorticoid (GC)-mediated inhibition of TNF up-regulated mRNA levels of MCP-1 and MMP-9, further supporting the general character of our findings. Results are shown  $\pm$  SD. \*,  $P < 0.05$ ; \*\*,  $P < 0.01$ . A549 cells were treated with solvent, DEX (1  $\mu$ M), GW647 (500 nM), or WY (10  $\mu$ M) or various combinations for 8 h. mRNA was isolated and reverse transcribed, and cDNA was subjected either to SYBR Green quantitative PCR (QPCR) with primers to detect MCP-1 or MMP-9. The sequences of used primer pairs are available upon request. QPCR measurements were performed in triplicate. QPCR results, normalized to expression of household genes, are shown  $\pm$  SD. (C) PPAR $\alpha$  agonists potentiate the antiinflammatory effect of DEX in primary murine hepatocytes. Cells were treated for 24 h with either solvent (DMSO), DEX (1  $\mu$ M), or DEX and WY (10  $\mu$ M) together. Total RNA was prepared from mouse hepatocytes. RNA concentration and quality were verified using the Agilent 2100 BioAnalyser (Agilent Technologies, Massy, France). Total RNA (1.5  $\mu$ g) was used to synthesize double-stranded cDNA using Superscript II and DNA Polymerase I (Invitrogen, Eragny, France), and the template for an in vitro transcription reaction was used to synthesize biotin-labeled antisense cRNA (GeneChip Expression 3'-Amplification Reagents for IVT Labeling; Affymetrix, Inc.); 15  $\mu$ g of labeled cRNA was fragmented (Tris-acetate, KOAc and MgOAc buffer; 94  $^{\circ}$ C for 35 min), hybridized to the Affymetrix Mouse Genome 430.2 GeneChips and scanned (Affymetrix GeneChip Scanner GCS3000), according to the Affymetrix GeneChip protocol. Very stringent quality verifications at the different steps of the protocol (including total RNA integrity, reverse transcription rate, amplification and cRNA labeling efficiency, hybridization on the chips and quality of the probesets using the intensity signals of housekeeping reference genes) did not lead to the exclusion of samples. Background correction and quantile normalization were performed for the raw microarray data using Bioconductor tools resulting in probesets intensities for each GeneChip. The analysis consisted of comparing expression data from two conditions (DMSO as reference). Ratios were calculated for each probeset, allowing identification of differential gene expression. Statistical analysis was not performed because there was a single Genechip for each condition. The data table represents the mRNA modulation profiles of the reference compounds as compared with the DMSO control. For negative modulation (values  $< 1$ ), the ratio is determined by dividing  $-1$  by the experimental samples over control ratio. Negative values correspond to gene inhibition.

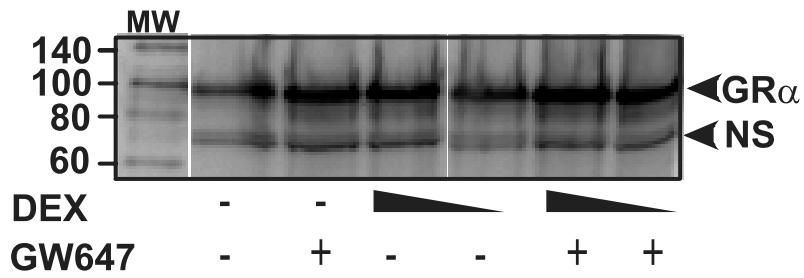

**Fig. S2.** Activation of PPAR $\alpha$  does not affect GR $\alpha$  protein levels. Western blot analysis of a pool of four 24-well plates (from the same transfection and induction set-up as Fig. 2D), corresponding to 30  $\mu$ g of total protein, was performed using an anti-GR $\alpha$  rabbit polyclonal antibody (upper bands, GR $\alpha$ ). NS is a nonspecific band that serves as a loading control.





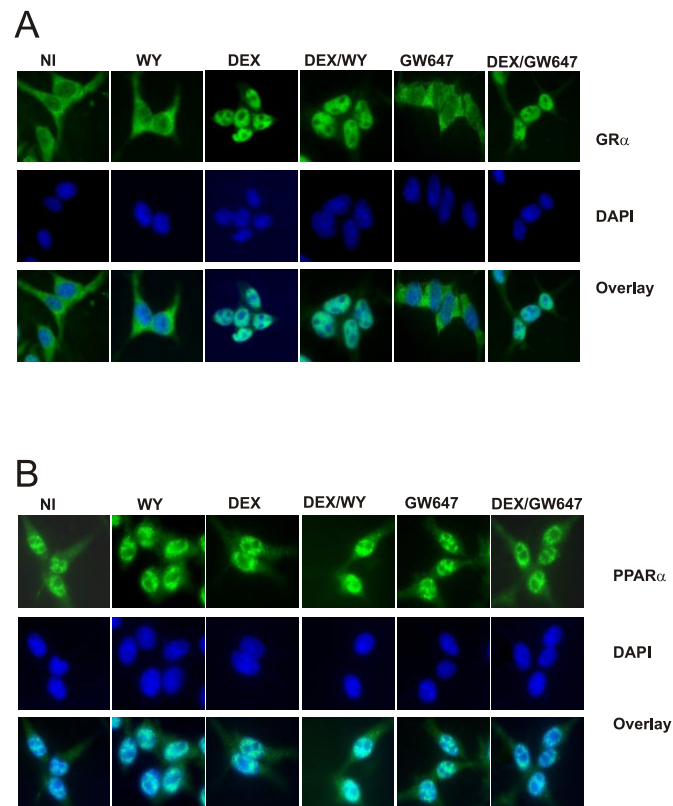

**Fig. S5.** PPAR $\alpha$  agonists do not influence the GC-induced nuclear translocation of GR $\alpha$ , and GC treatment does not affect the subcellular localization of PPAR $\alpha$ . After serum starvation in phenol red-free medium for 24 h, BWTG3 cells were treated with solvent (NI) or induced with DEX (1  $\mu$ M), WY (50  $\mu$ M), GW647 (500 nM), or various combinations thereof. After fixation, cells were subjected to immunostaining with anti-GR or PPAR $\alpha$ , followed by anti-rabbit Alexa Fluor 488 as a secondary Ab. DAPI staining was used to visualize the nuclei. Fixation, permeabilization, and immunostaining procedures with BWTG3 cells were performed as described [De Bosscher K, et al. (2005) *Proc Natl Acad Sci USA* 102:15827–15832]. Images were acquired by using the 63 $\times$  lens of a Zeiss axiovert 200 microscope and with AxioVision Rel.4.5 software. (A) PPAR $\alpha$  agonists do not influence the DEX-induced nuclear translocation of GR. Because GR $\alpha$  moves from the cytoplasm to the nucleus upon loading with hormone, we wondered whether activated PPAR $\alpha$  would be able to influence the subcellular localization of activated GR $\alpha$ . By means of indirect immunofluorescence, analyzing the subcellular distribution of endogenous GR $\alpha$  protein in BWTG3 hepatocytes, it was clear that in solvent-treated cells GR $\alpha$  is predominantly cytoplasmic, although a certain fraction of GR $\alpha$  appears to be already nuclear. Induction with DEX for 3 h leads to an efficient nuclear translocation of GR $\alpha$ . PPAR $\alpha$  ligands do not affect the subcellular localization of GR $\alpha$ . Upon combining DEX and PPAR $\alpha$  ligands, PPAR $\alpha$  agonists do not influence the DEX-induced nuclear translocation of GR. (B) PPAR $\alpha$  is localized predominantly in the nucleus, regardless of the presence of PPAR agonists or PPAR agonists combined with DEX. The various treatments did not affect the subcellular localization of PPAR $\alpha$ , which is always predominantly nuclear.





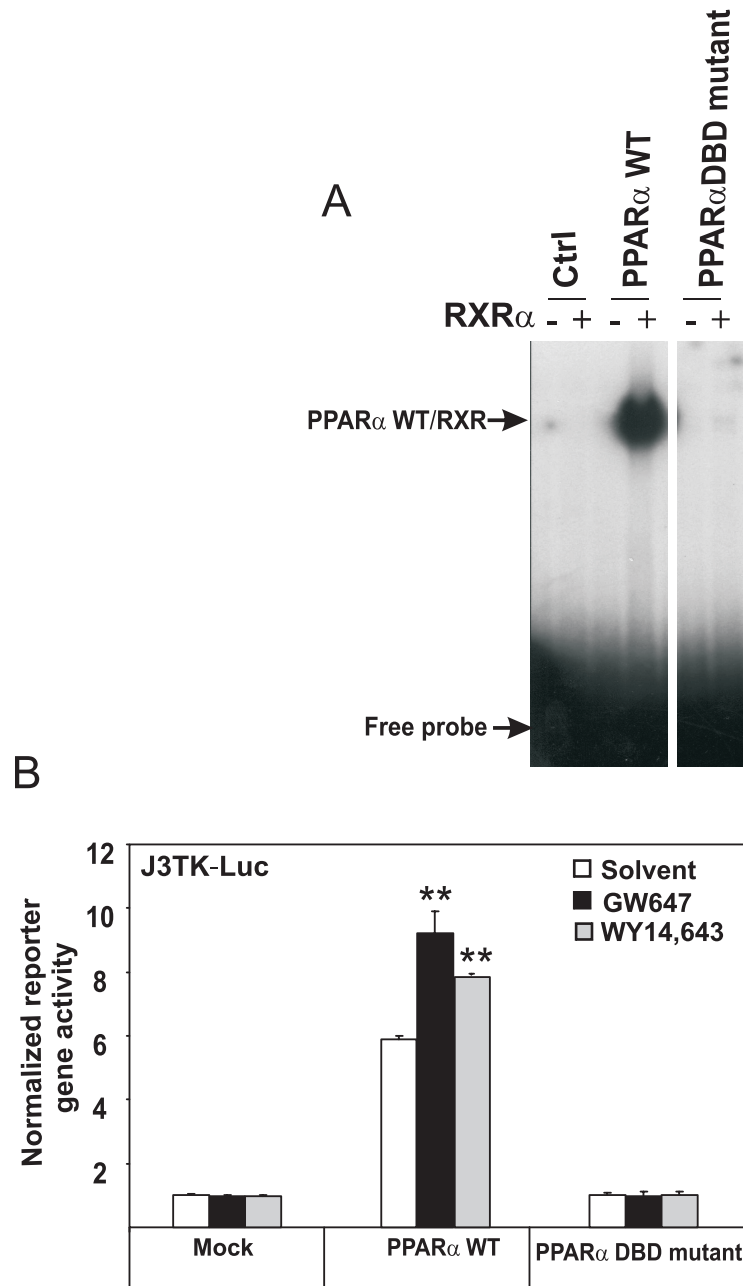

**Fig. 58.** Characterization of the PPAR $\alpha$ -DBD mutant. (A) Electrophoretic mobility shift assay of the DR1 consensus was performed, using proteins as indicated in the figure. Mouse PPAR $\alpha$  wild type (WT) and the PPAR $\alpha$  DBD mutant proteins were obtained from expression vectors by *in vitro* transcription and translation T3 TNTR-coupled reticulocyte lysate system (Promega). Translation was followed by SDS/PAGE analysis and visualized by immunoblotting using a PPAR $\alpha$ -specific antibody (Santa Cruz Biotechnology) to assess the correct size of translated proteins. *In vitro* translated proteins were preincubated for 10 min at room temperature in a total volume of 20  $\mu$ L containing 0.5  $\mu$ g of poly(dI-dC) and 0.5  $\mu$ g of herring sperm DNA in the following binding buffer: 10 mM Hepes (pH 7.8), 100 mM NaCl, 0.1 mM EDTA, 0.5 mM DTT, 1 mg/mL BSA, and 10% (vol/vol) glycerol. The radiolabeled probes ( $1 \times 10^5$  cpm of  $^{32}$ P-labeled probe) were added, and the binding reaction was incubated for a further 15 min at room temperature. The proteins–DNA complexes were resolved on 6% nondenaturing PAGE in a 0.5% Tris–borate–EDTA running buffer at room temperature and visualized after autoradiography. Only PPAR $\alpha$  WT, but not the triple-point mutant, can bind DR1, in the presence of retinoic acid receptor (RXR). Human hydroxymethyl-glutaryl-CoA synthase (HMG-CoA synthase), human CPT-1, and ACO PPREs gave similar results. (B) The PPAR $\alpha$  DBD mutant does not support transactivation of a PPRE-driven reporter gene. Equal amounts of the corresponding empty vector, PPAR $\alpha$  WT or the PPAR $\alpha$  DBD mutant were transfected together with J3TK-luc (a PPRE-driven reporter gene) and the  $\beta$ -galactosidase expressing plasmid in HEK293T cells. Cells were stimulated for 8 h with solvent, WY (50  $\mu$ M), or GW647 (500 nM). Cell lysates were assayed for luc activities and normalized for  $\beta$ -gal activities. Promoter activities are expressed as relative induction factor, i.e., the ratio of expression levels of induced versus the noninduced (mock) condition.
